# Supplementary material for: The Reactivity of Azidonitrobenzofuroxans towards 1,3-Dicarbonyl Compounds: Unexpected Formation of Amino Derivative via the Regitz Diazo Transfer and Tautomerism Study
Source: MDPI journal article supplement (doi:10.3390/ijms22179646), 2021-09-06
Supplement: s1 [file s1]

## SUPPLEMENTARY MATERIALS

### The Reactivity of Azidonitrobenzofuroxans Towards 1,3-Dicarbonyl Compounds: Unexpected formation of Amino Derivative via the Regitz Diazo Transfer and Tautomerism Study

Elena Chugunova <sup>1,2,\*</sup>, Almir Gazizov <sup>1,2\*</sup>, Daut Islamov <sup>1</sup>, Alexander Burilov <sup>1,2</sup>, Alena Tulesinova <sup>3</sup>, Sergey Kharlamov <sup>1</sup>, Victor Syakaev <sup>1</sup>, Vasily Babaev <sup>1</sup>, Nurgali Akylbekov <sup>4</sup>, Nurbol Appazov <sup>4,5\*</sup>, Konstantin Usachev <sup>6</sup>, Rakhmetulla Zhapparbergenov <sup>4</sup>

<sup>1</sup> Arbuzov Institute of Organic and Physical Chemistry, FRC Kazan Scientific Center, Russian Academy of Sciences, Kazan 420088, Russia; daut1989@mail.ru (D.I.); burilov\_2004@mail.ru (A.B.); khsergey@inbox.ru (S.Kh.); vsyakaev@iopc.ru (V.S.); babaev-84@mail.ru (V.B.)

<sup>2</sup> Laboratory of Plant Infectious Diseases, FRC Kazan Scientific Center of Russian Academy of Sciences, Kazan 420111, Russia

<sup>3</sup> Institute of Chemical Engineering and Technology, The Kazan National Research Technological University, Kazan 420015, Russia; tulesinova.a@yandex.ru

<sup>4</sup> Laboratory of engineering profile "Physical and chemical methods of analysis", Korkyt Ata Kyzylorda University, Aiteke bie str., 29A, Kyzylorda 120014, The Republic of Kazakhstan; nurgali\_089@mail.ru (N.A.), ulagat-91@mail.ru (R.Zh.)

<sup>5</sup> I. Zhakhaev Kazakh Scientific Research Institute of Rice Growing, Abay avenue, 25B, Kyzylorda 120008, Kazakhstan;

<sup>6</sup> Kazan Institute of Biochemistry and Biophysics, FRC Kazan Scientific Center of Russian Academy of Sciences, Kazan 420111, Russia; k.usachev@mail.ru

\* chugunova.e.a@gmail.com (E.C.); agazizov@iopc.ru (A.G.); nurasar.82@mail.ru (N.A.); Tel.: +7-843-272-7324 (E.C., A.G.), +7-724-223-1041 (N.A.)

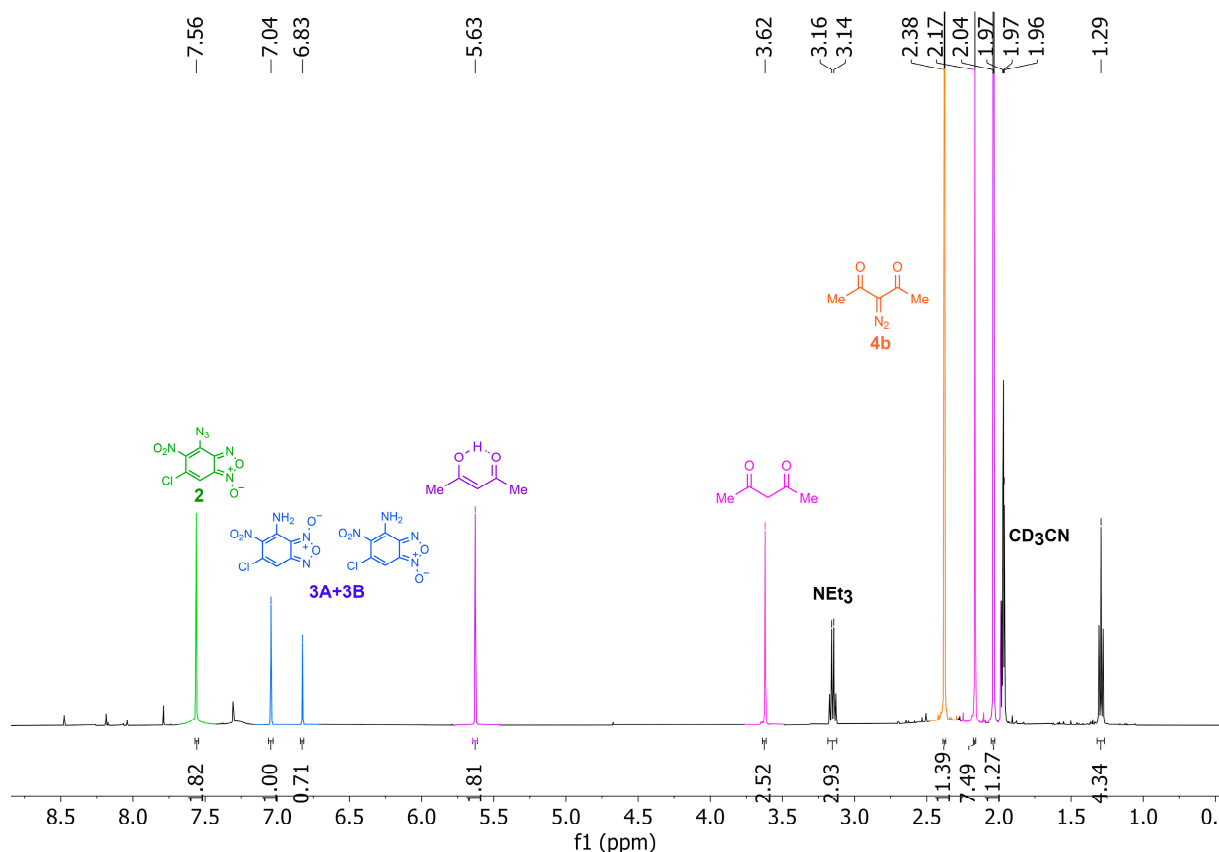

**Figure S1.** The <sup>1</sup>H NMR spectra of the reaction mixture of the azidobenzofuroxan **2** with acetylacetone (CD<sub>3</sub>CN, 400 MHz, 303K).

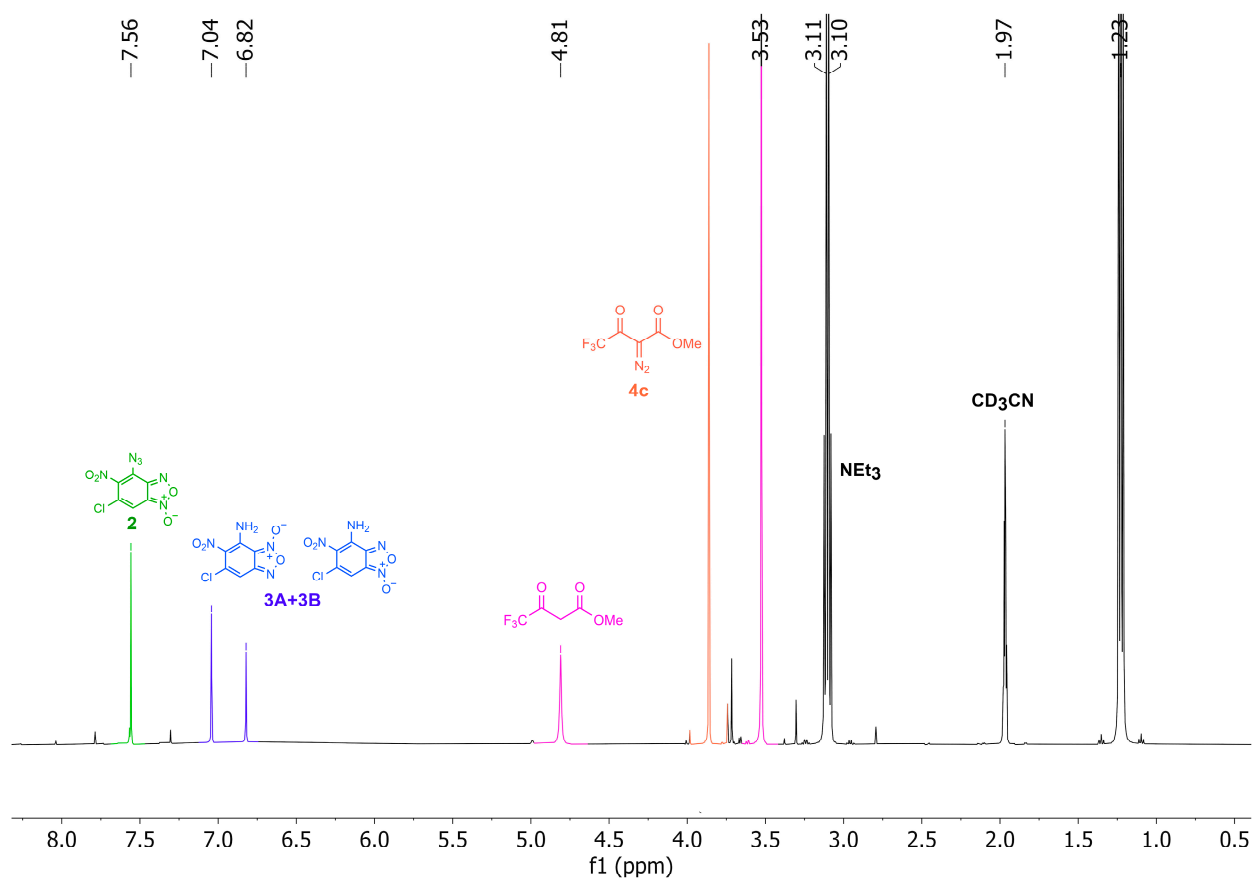

**Figure S2.** The  $^1\text{H}$  NMR spectra of the reaction mixture of the azidobenzofuroxan **2** with trifluoromethyl-3-oxobutanoic acid ester ( $\text{CD}_3\text{CN}$ , 400 MHz, 303K).

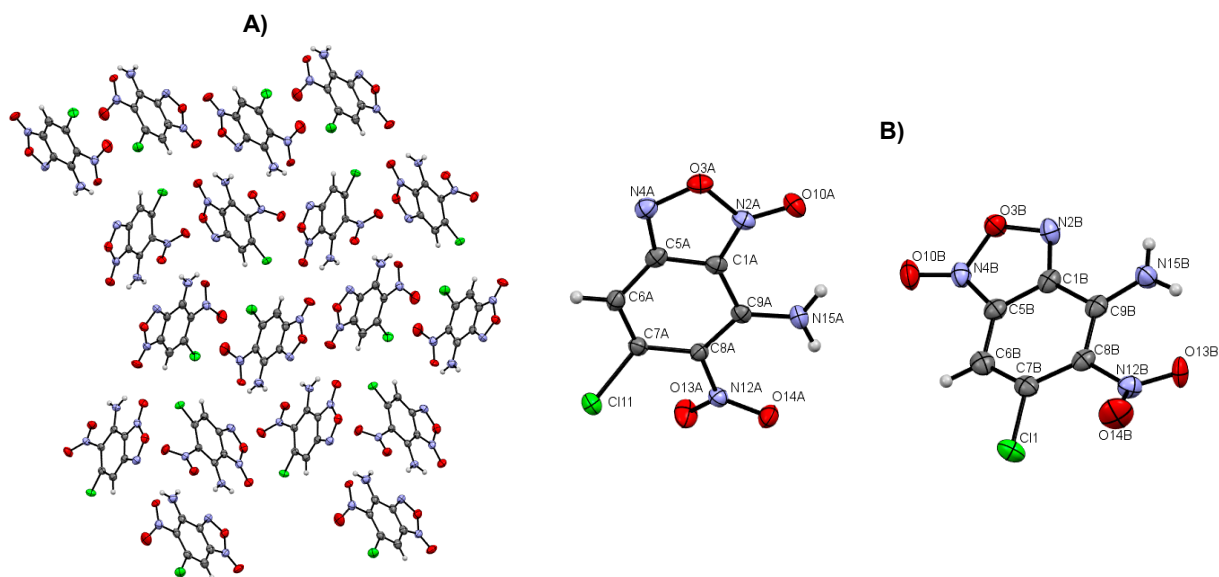

**Figure S3.** A) Crystal packing of **3** view along  $a$  axes; B) Asymmetric unit of tautomers **3A** and **3B** showing 50% probability thermal ellipsoids. C atoms –grey, N atoms – blue, O atoms – red, Cl atom – green.

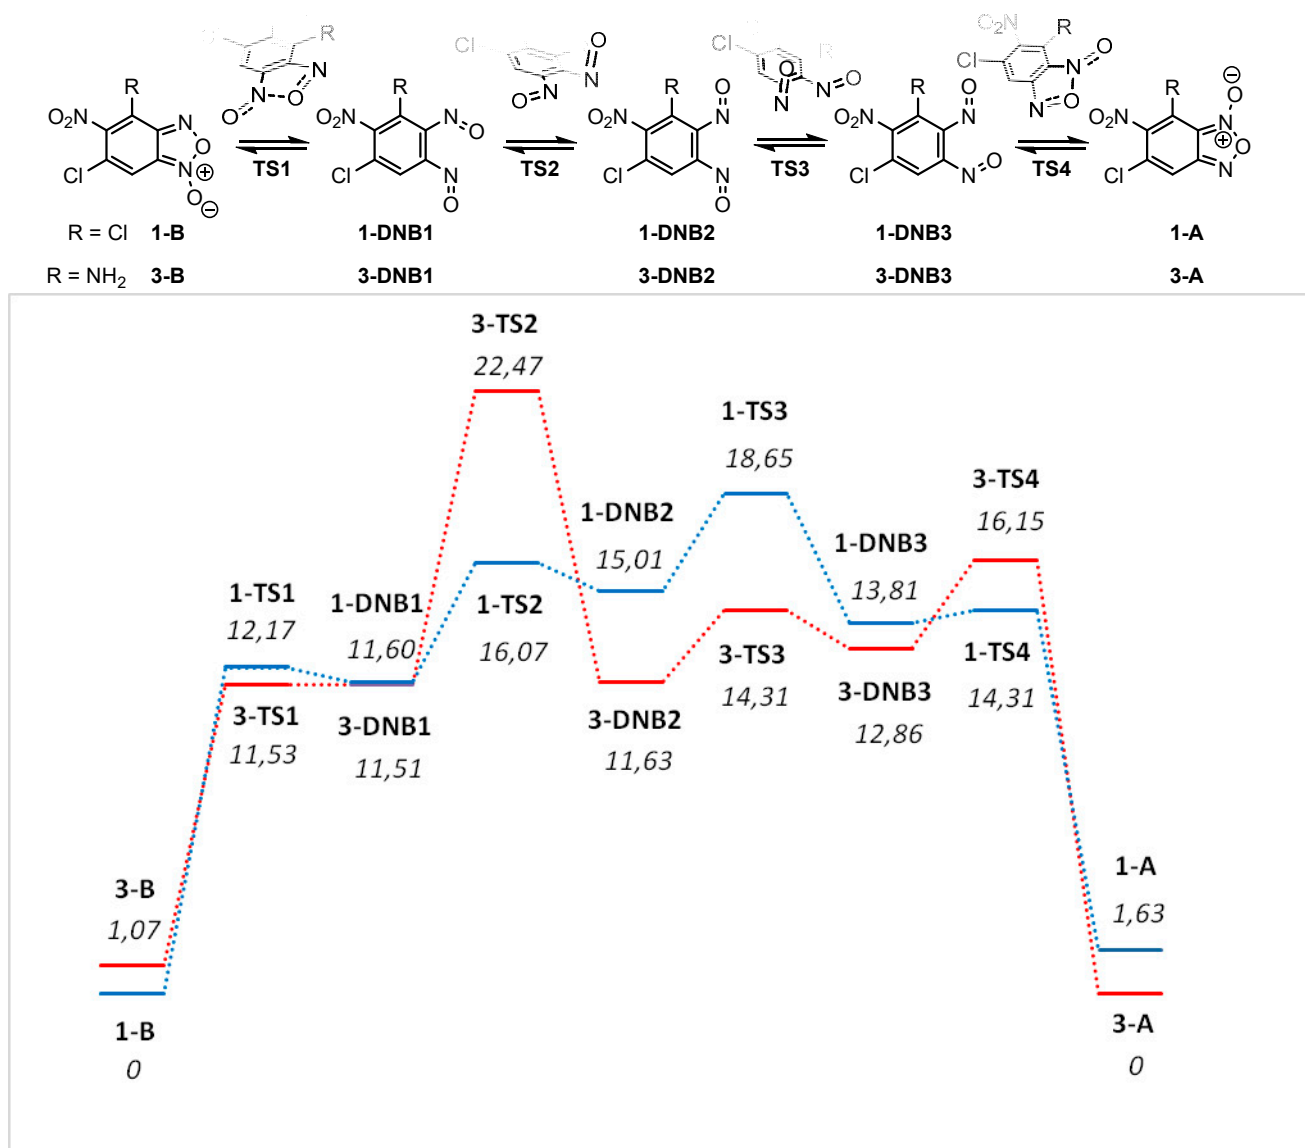

**Figure S4.** Isomerization mechanism of benzofuroxans **1,3** and energy diagram (kCal/mol) as obtained from quantum chemistry calculations (B3LYP/6-31+g(2d,p), Gaussian 16)

**Table S1.** Hydrogen-bond geometry in crystals of the compound **3**.

| D—H···A          | D—H, Å | H···A, Å | D···A, Å   | D—H···A, ° |
|------------------|--------|----------|------------|------------|
| N15A—H15C···O14A | 0.86   | 2.06     | 2.638 (5)  | 123.9      |
| N15A—H15D···O10B | 0.86   | 2.10     | 2.800 (4)  | 138.3      |
| N15B—H15A···O13B | 0.86   | 1.98     | 2.543 (7)  | 121.9      |
| N15B—H15A···O13C | 0.86   | 2.05     | 2.636 (13) | 124.9      |

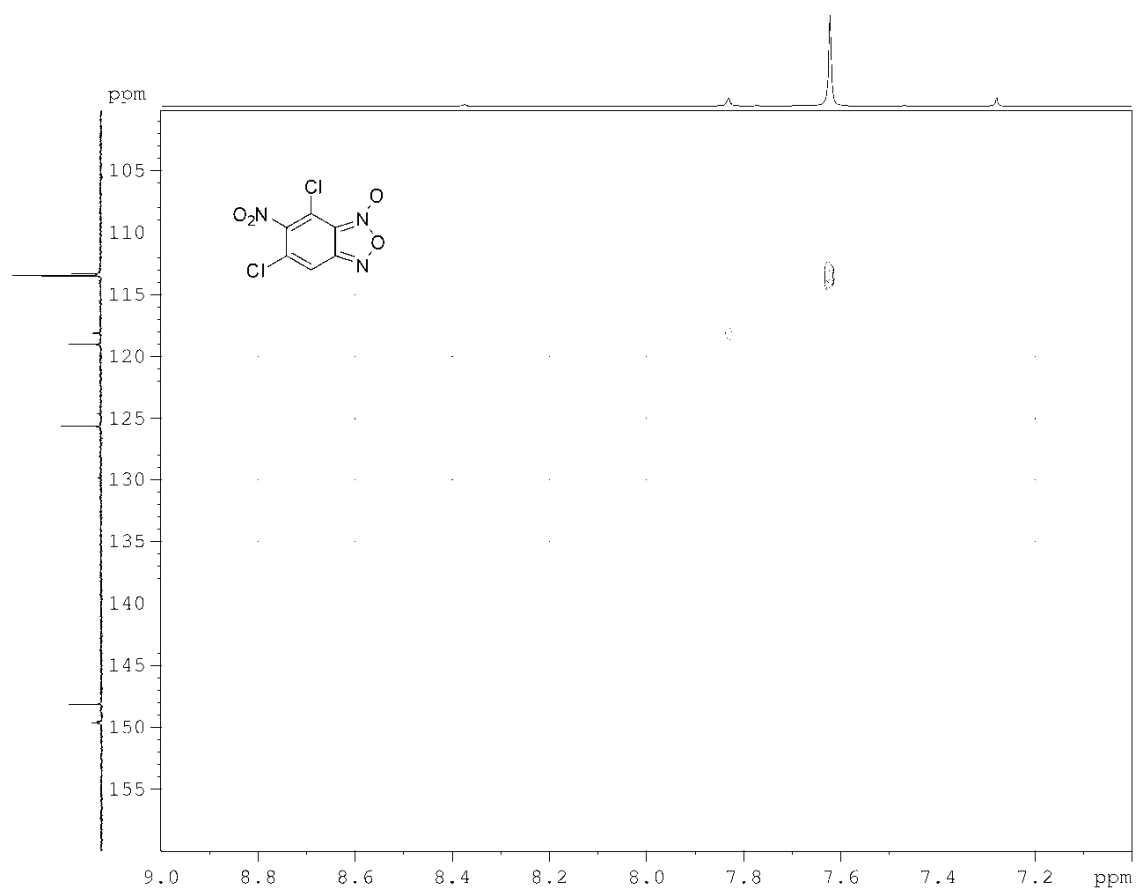

**Figure S5.**  $^1\text{H}$ - $^{13}\text{C}$  HSQC NMR spectrum of **1**,  $\text{CDCl}_3$ , 253K.

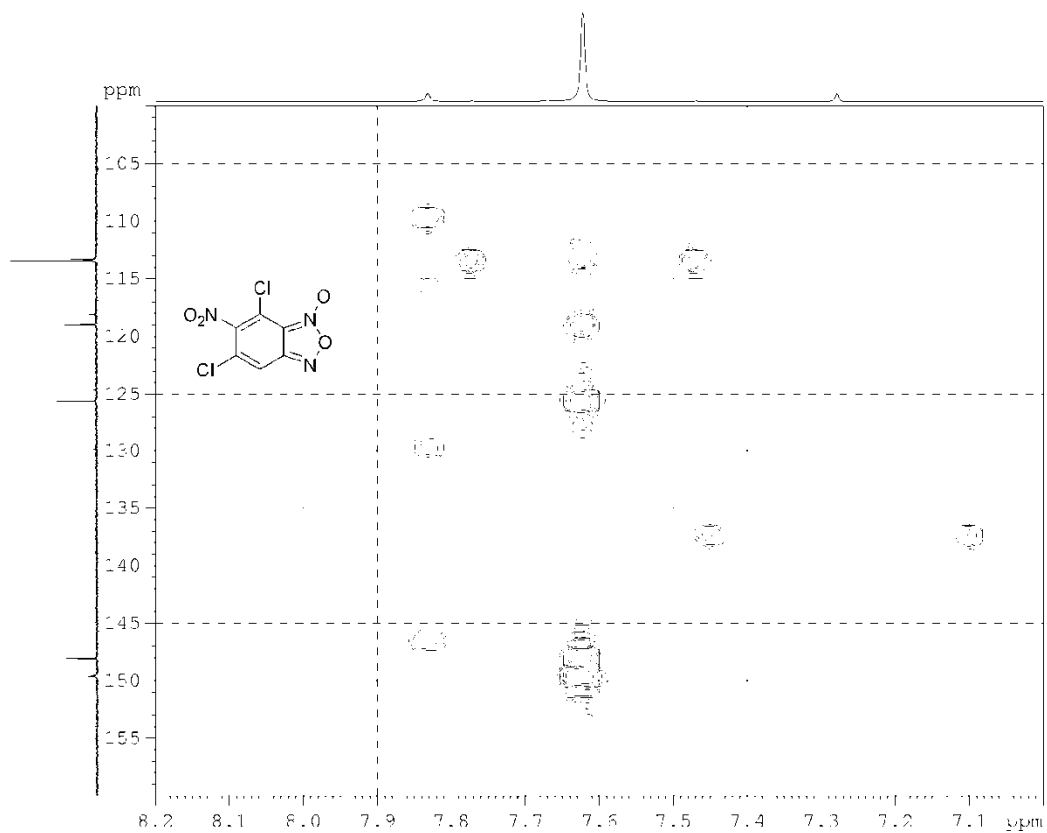

**Figure S6.**  $^1\text{H}$ - $^{13}\text{C}$  HMBC NMR spectrum of **1**,  $\text{CDCl}_3$ , 253K.

**Table S2.** Experimental and calculated NMR parameters for **1** (253K)

|                                                                                                |              |            |                                                                                                  |              |            |
|------------------------------------------------------------------------------------------------|--------------|------------|--------------------------------------------------------------------------------------------------|--------------|------------|
| 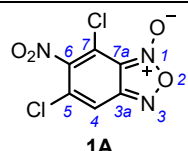<br><b>1A</b> |              |            | <br><b>1B</b> |              |            |
| Energy, kCal/mol                                                                               |              |            |                                                                                                  |              |            |
| 0                                                                                              |              |            | 1.63                                                                                             |              |            |
| Nucleus                                                                                        | Experimental | Calculated | Nucleus                                                                                          | Experimental | Calculated |
| C5                                                                                             | 129.9        | 135.8      | C6                                                                                               | 125.6        | 129.6      |
| C4                                                                                             | 118.1        | 116.3      | C7                                                                                               | 113.5        | 111.9      |
| C3a                                                                                            | 149.5        | 147.2      | C7a                                                                                              | 113.3        | 111.3      |
| C7a                                                                                            | 109.6        | 109.5      | C3a                                                                                              | 148.1        | 145.9      |
| C7                                                                                             | 115.5        | 120.9      | C4                                                                                               | 119.0        | 123.5      |
| C6                                                                                             | 146.6        | 145.4      | C5                                                                                               | 149.6        | 149.1      |
| N3                                                                                             | _*           | 378.8      | N1                                                                                               | -            | 373.8      |
| N1                                                                                             | -            | 375.2      | N3                                                                                               | -            | 383.2      |
| NO <sub>2</sub>                                                                                | -            | 374.0      | NO <sub>2</sub>                                                                                  | -            | 373.7      |
| H4                                                                                             | 7.83         | 7.58       | H7                                                                                               | 7.63         | 7.43       |

\* - CS was not measured due to low s/n ratio

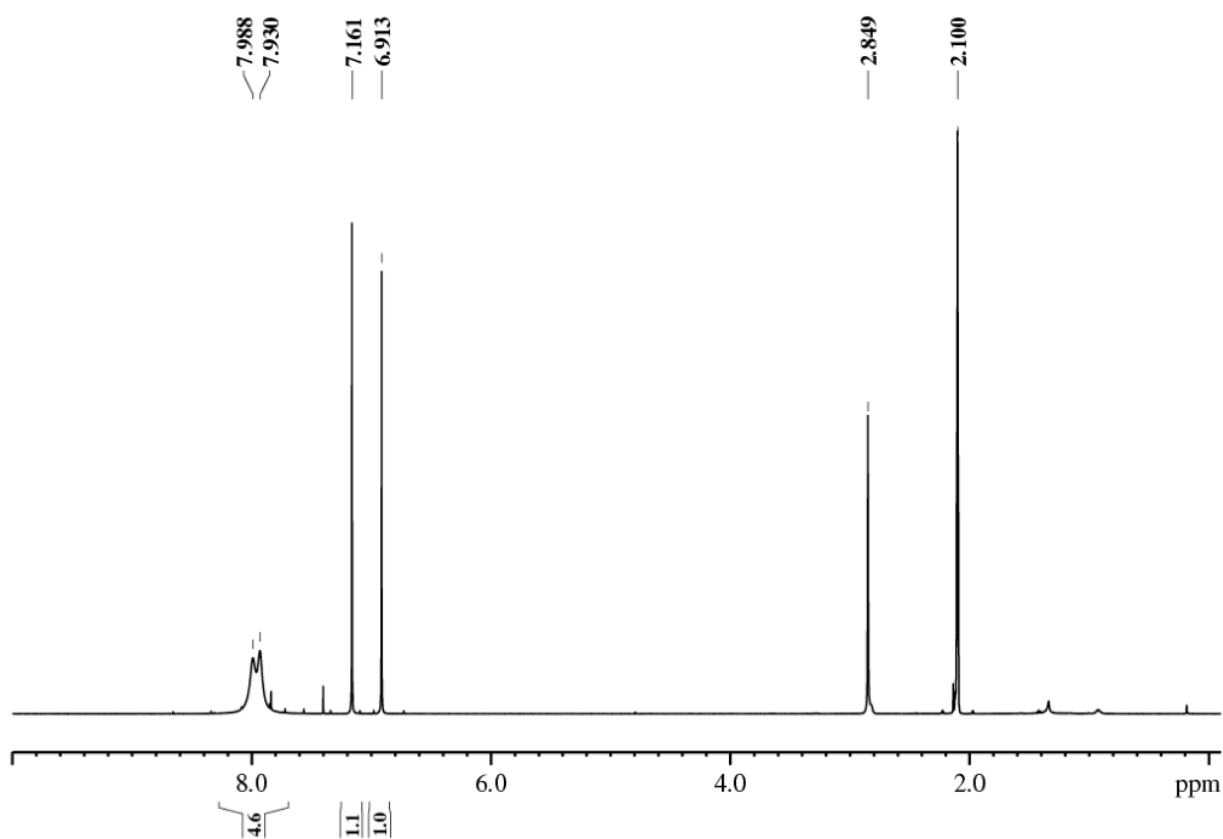

**Figure S7.** <sup>1</sup>H NMR (acetone-*d*<sub>6</sub>, 500 MHz, 303 K) mixture of tautomers **3A** and **3B**.

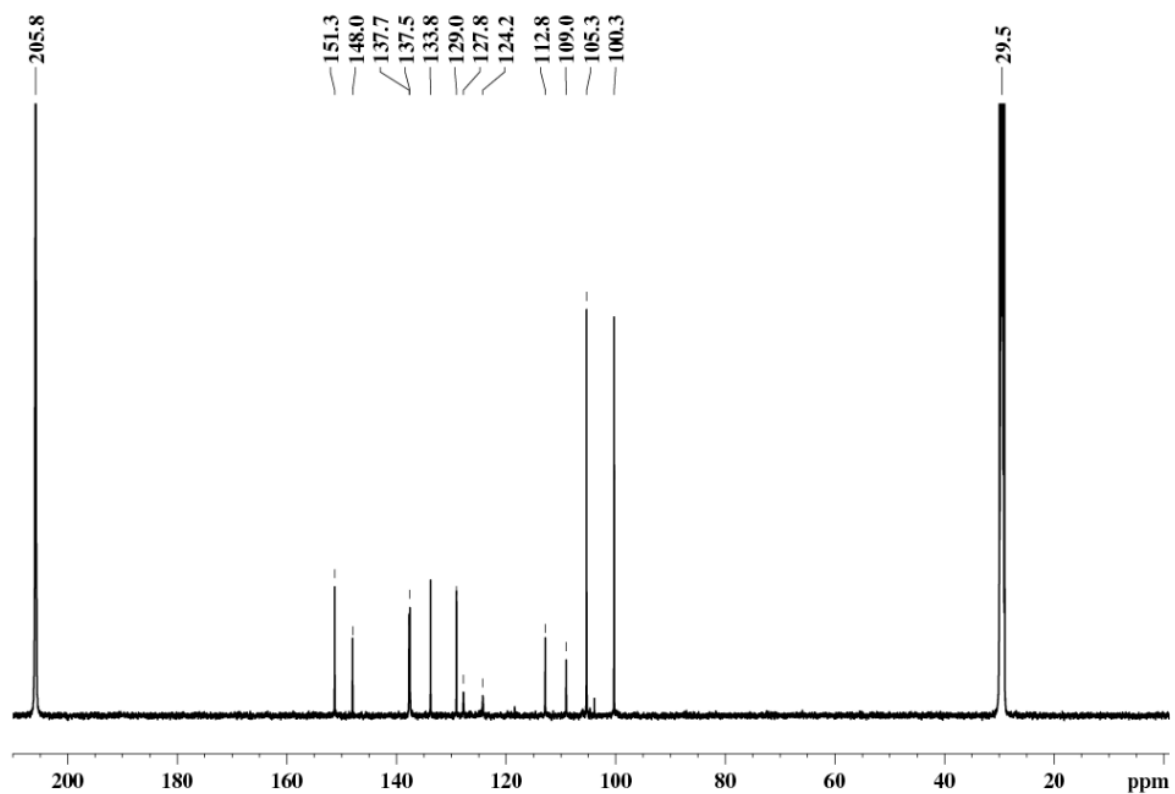

Figure S8.  $^{13}\text{C}\{^1\text{H}\}$  NMR (acetone- $d_6$ , 126 MHz, 303 K) mixture of tautomers **3A** and **3B**.

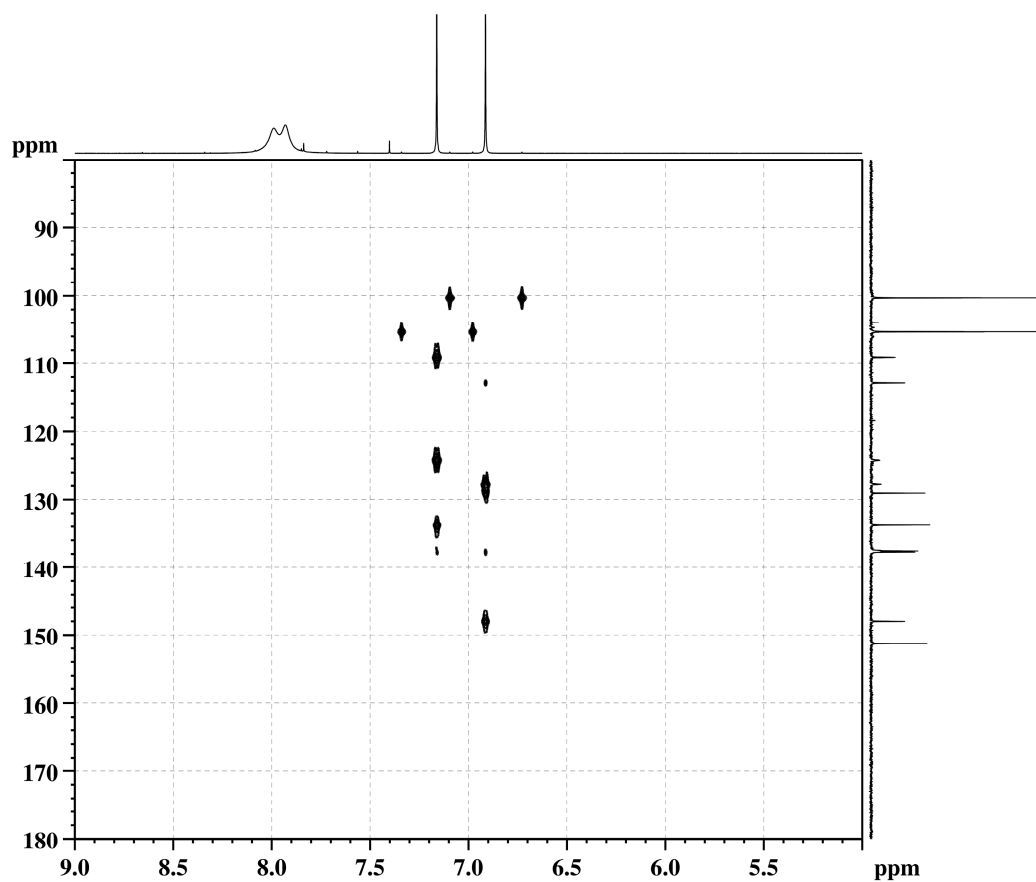

Figure S9. HMBC( $^{13}\text{C}$ - $^1\text{H}$ ) NMR (acetone- $d_6$ , 303 K) mixture of tautomers **3A** and **3B**.

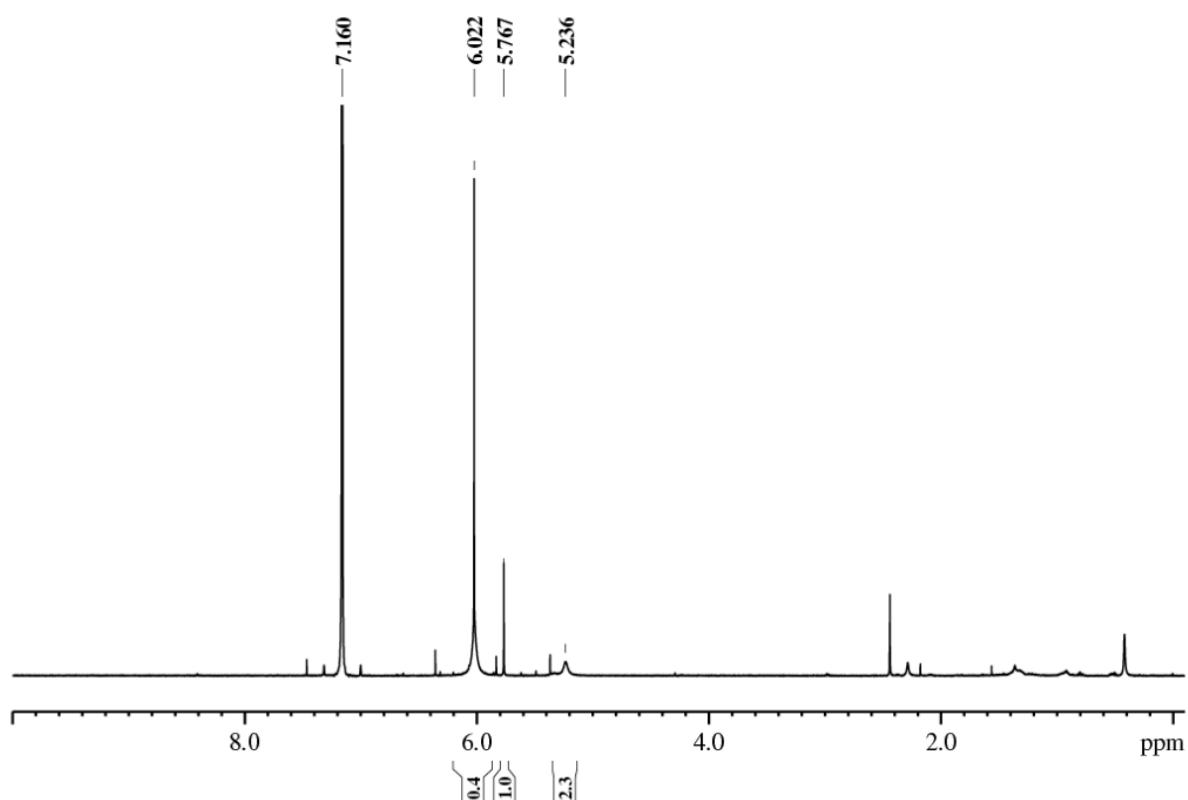

**Figure S10.**  $^1\text{H}$  NMR (benzene- $d_6$ , 500 MHz, 303 K) mixture of tautomers **3A** and **3B**.

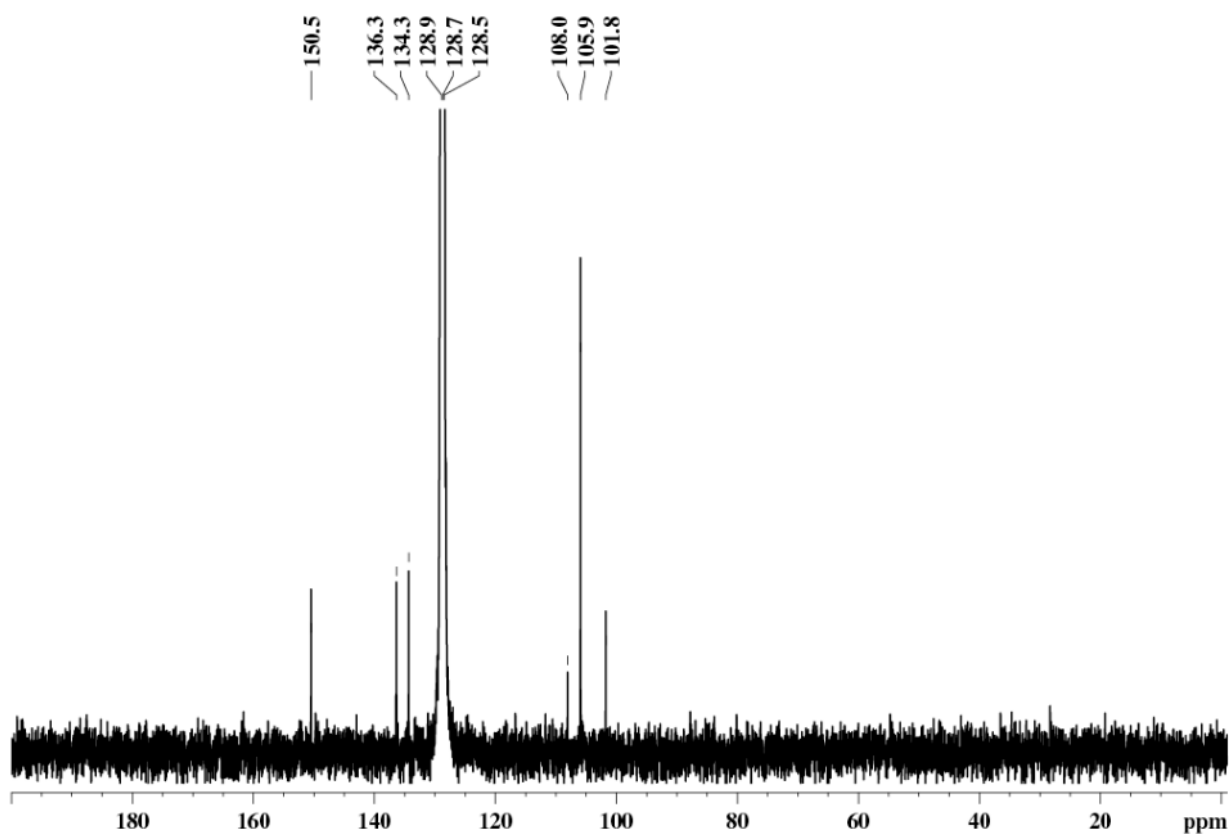

**Figure S11.**  $^{13}\text{C}\{^1\text{H}\}$  NMR (benzene- $d_6$ , 126 MHz, 303 K) mixture of tautomers **3A** and **3B**.

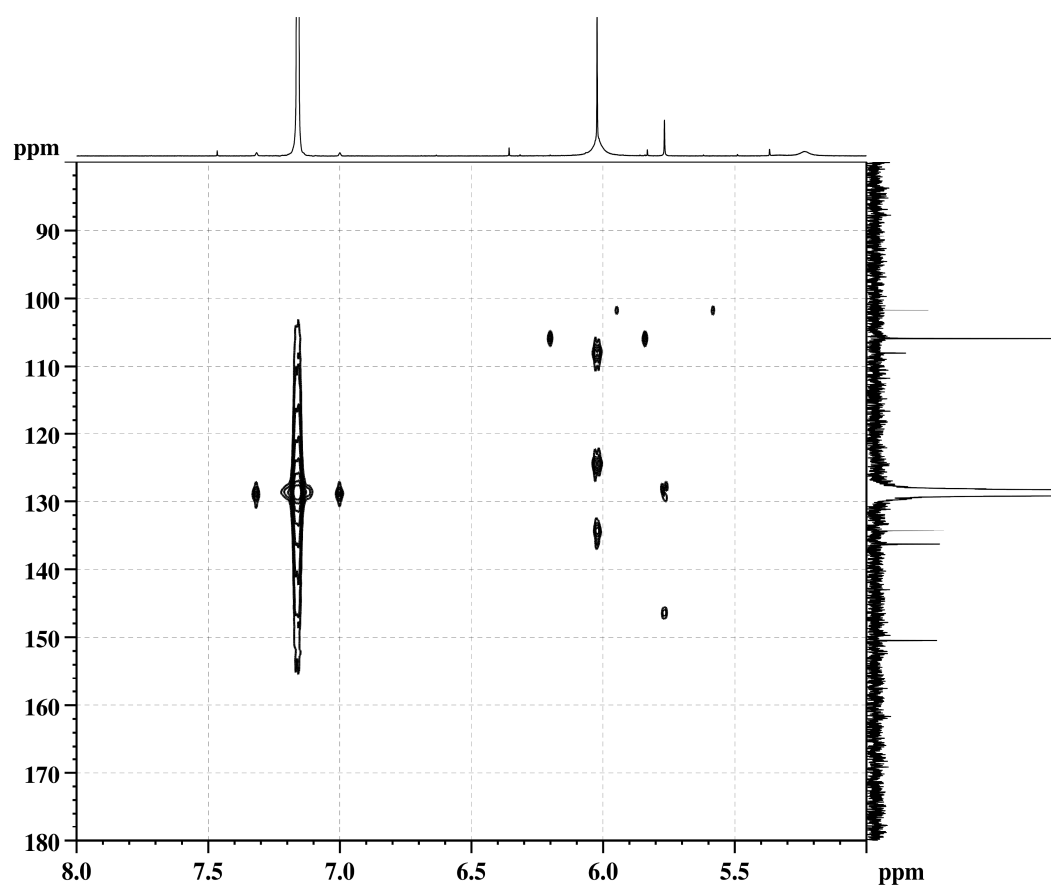

Figure S12. HMBC( $^{13}\text{C}$ - $^1\text{H}$ ) NMR (benzene- $d_6$ , 303 K) mixture of tautomers 3A and 3B.

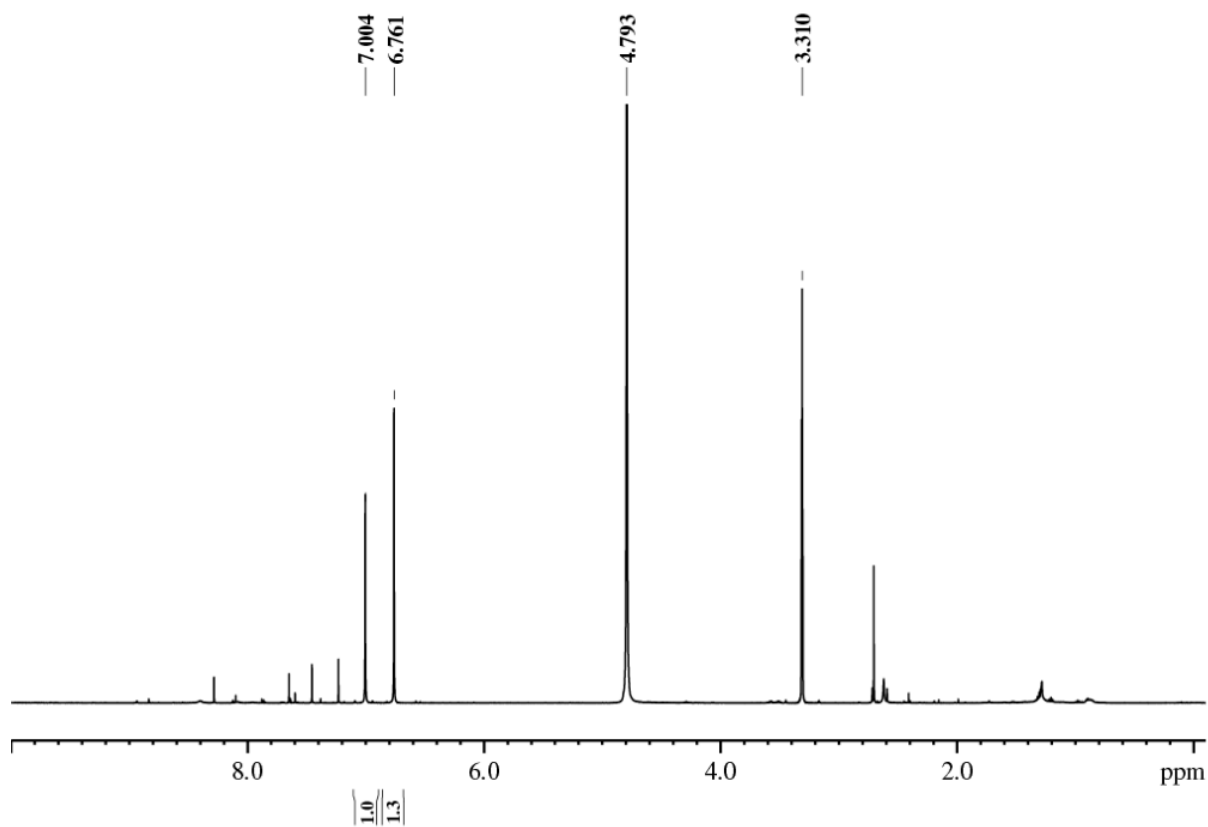

Figure S13.  $^1\text{H}$  NMR (methanol- $d_4$ , 500 MHz, 303 K) mixture of tautomers 3A and 3B.



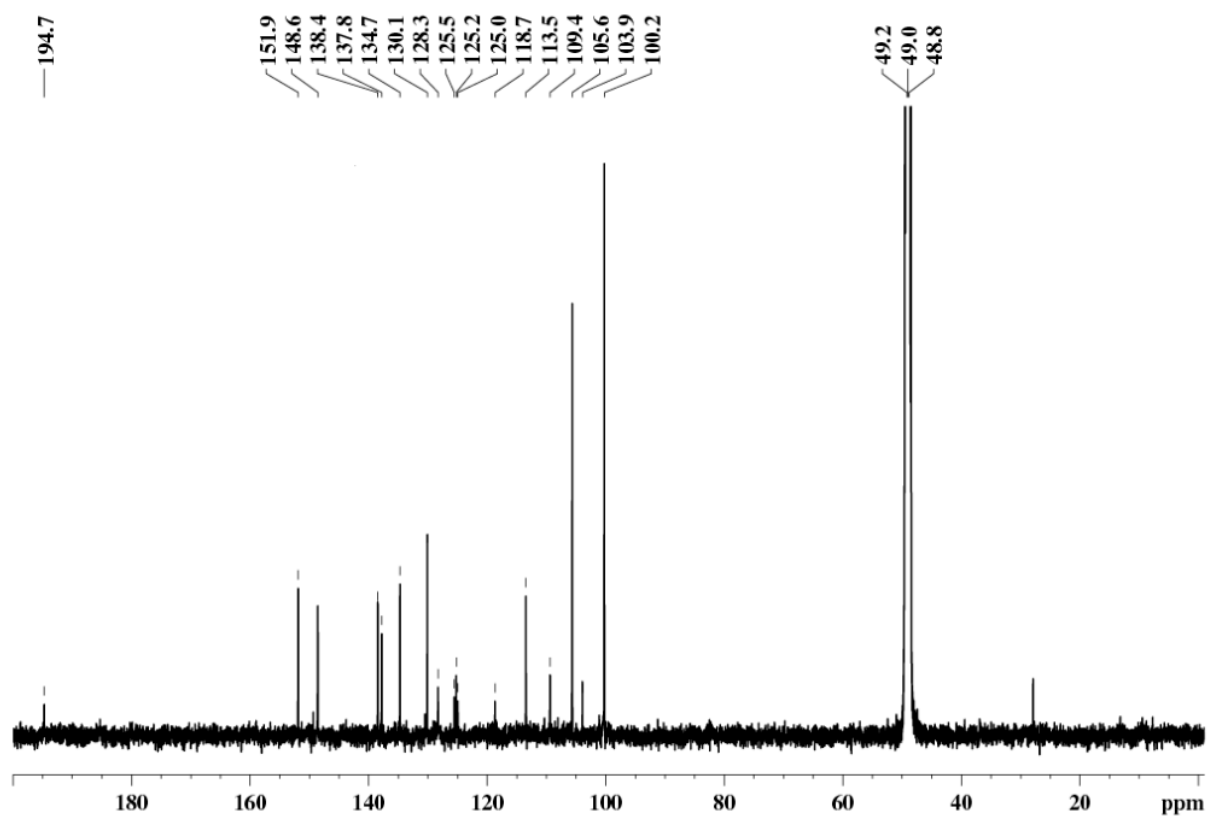

Figure S14.  $^{13}\text{C}\{^1\text{H}\}$  NMR (methanol- $d_4$ , 126 MHz, 303 K) mixture of tautomers 3A and 3B.

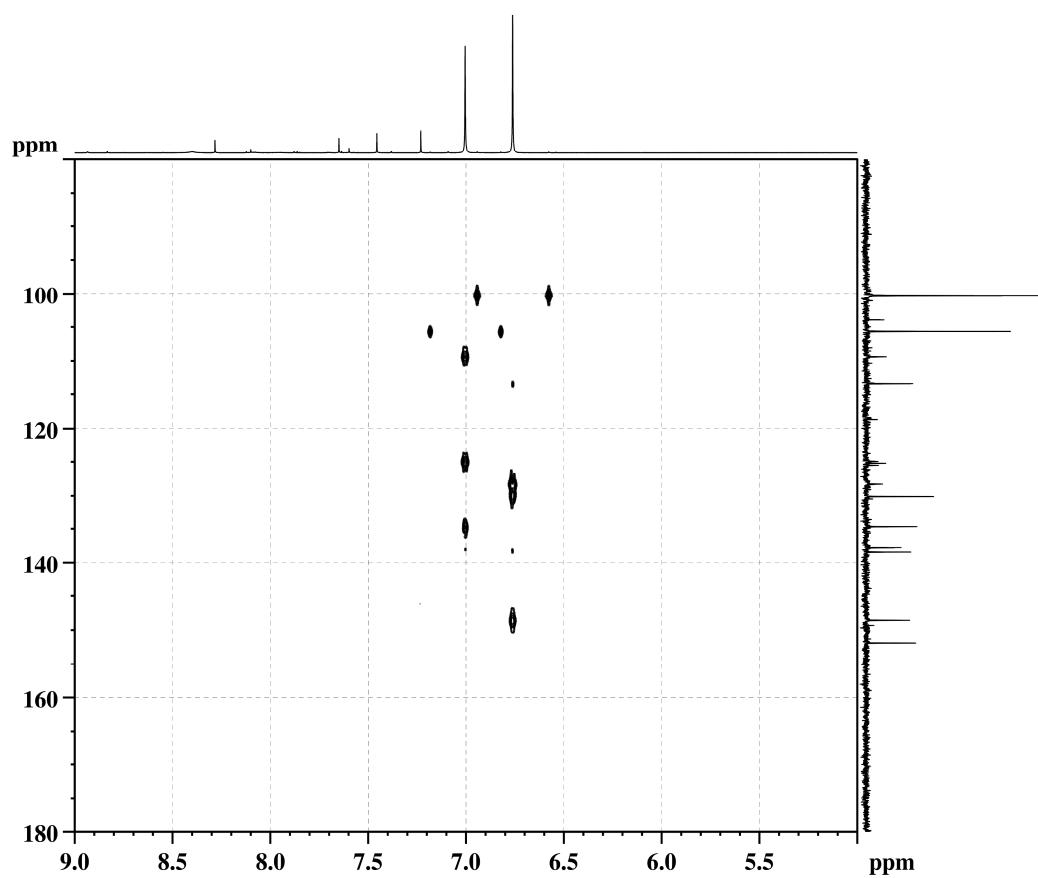

Figure S15. HMBC( $^{13}\text{C}$ - $^1\text{H}$ ) NMR (methanol- $d_4$ , 303 K) mixture of tautomers 3A and 3B.

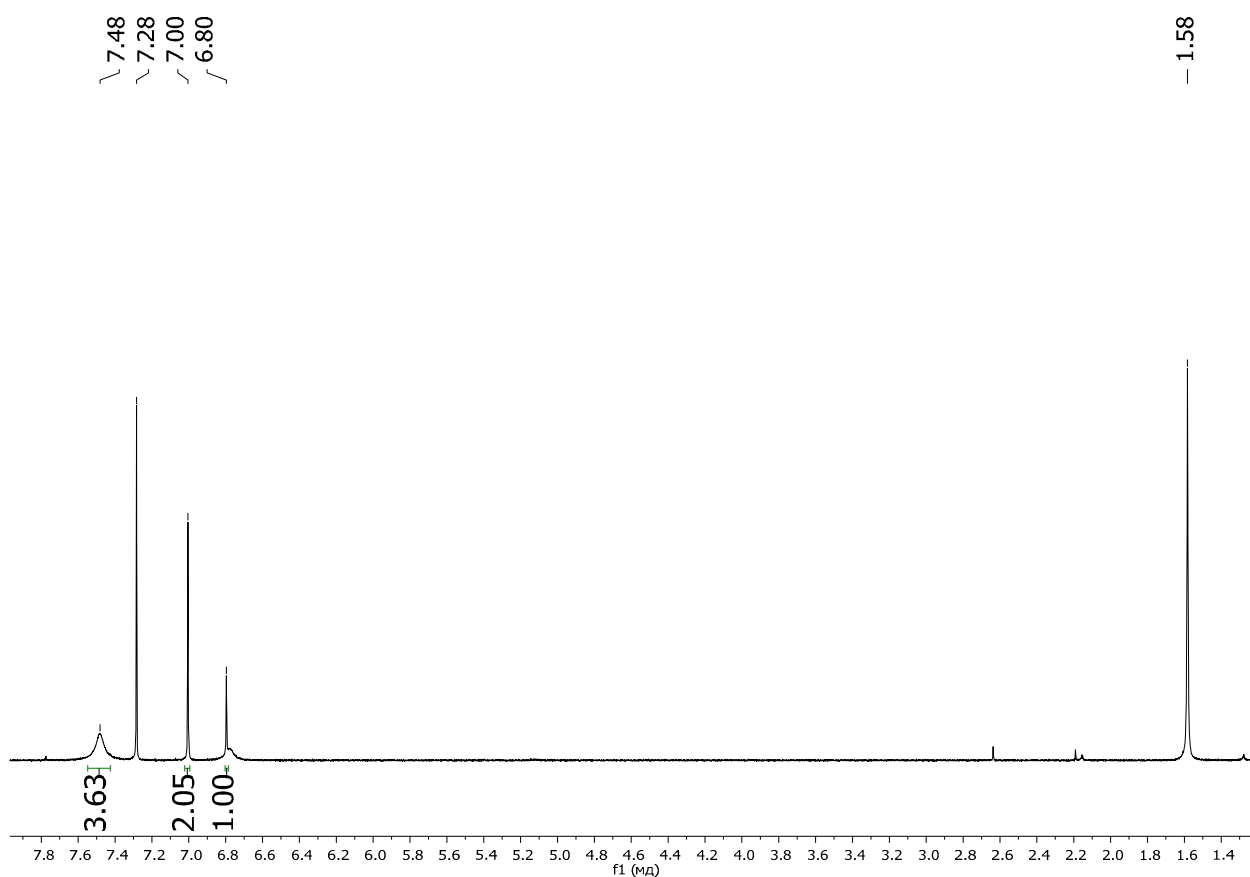

**Figure S16.**  $^1\text{H}$  NMR ( $\text{CDCl}_3$ , 500 MHz, 303 K) mixture of tautomers **3A** and **3B**.

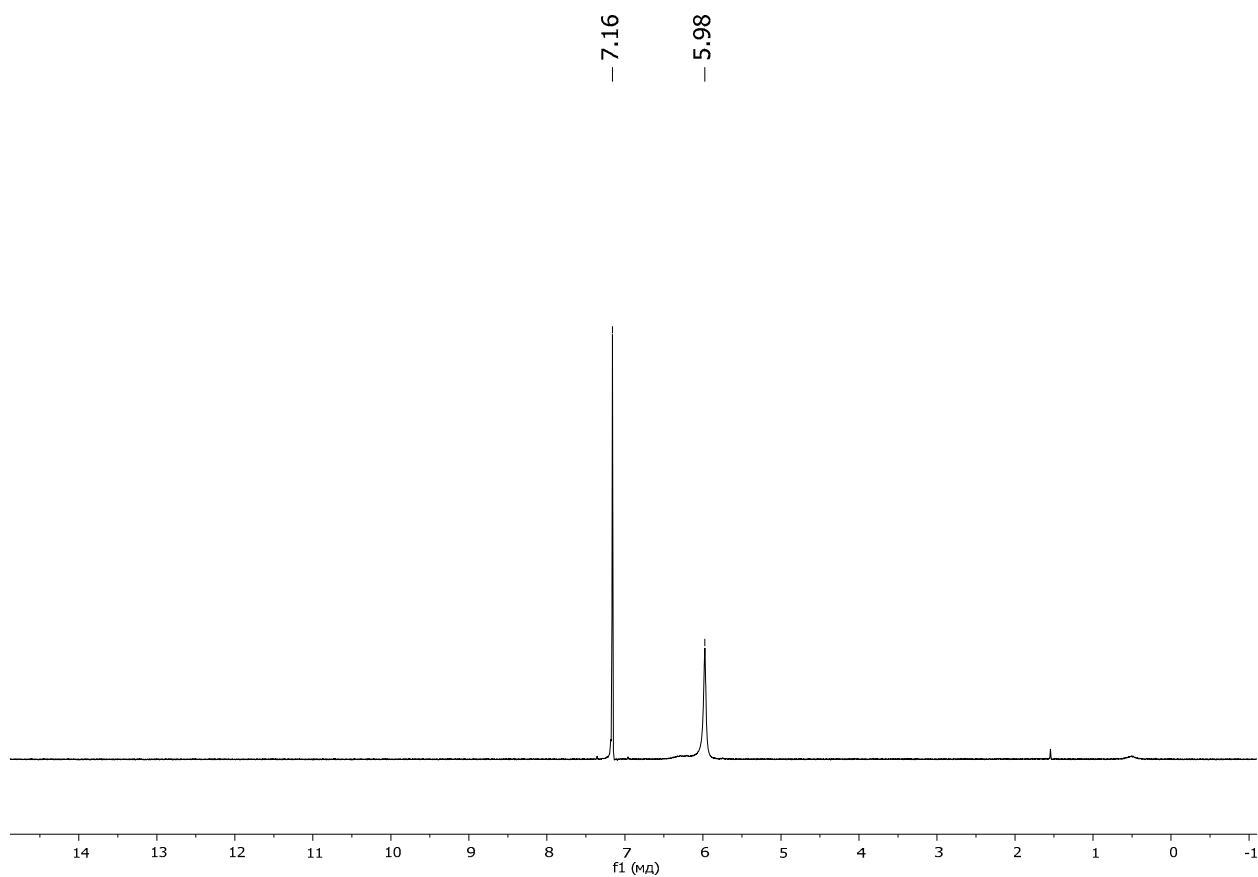

**Figure S17.**  $^1\text{H}$  NMR ( $\text{benzene-}d_6$ , 500 MHz, 303 K) of compound **1**.

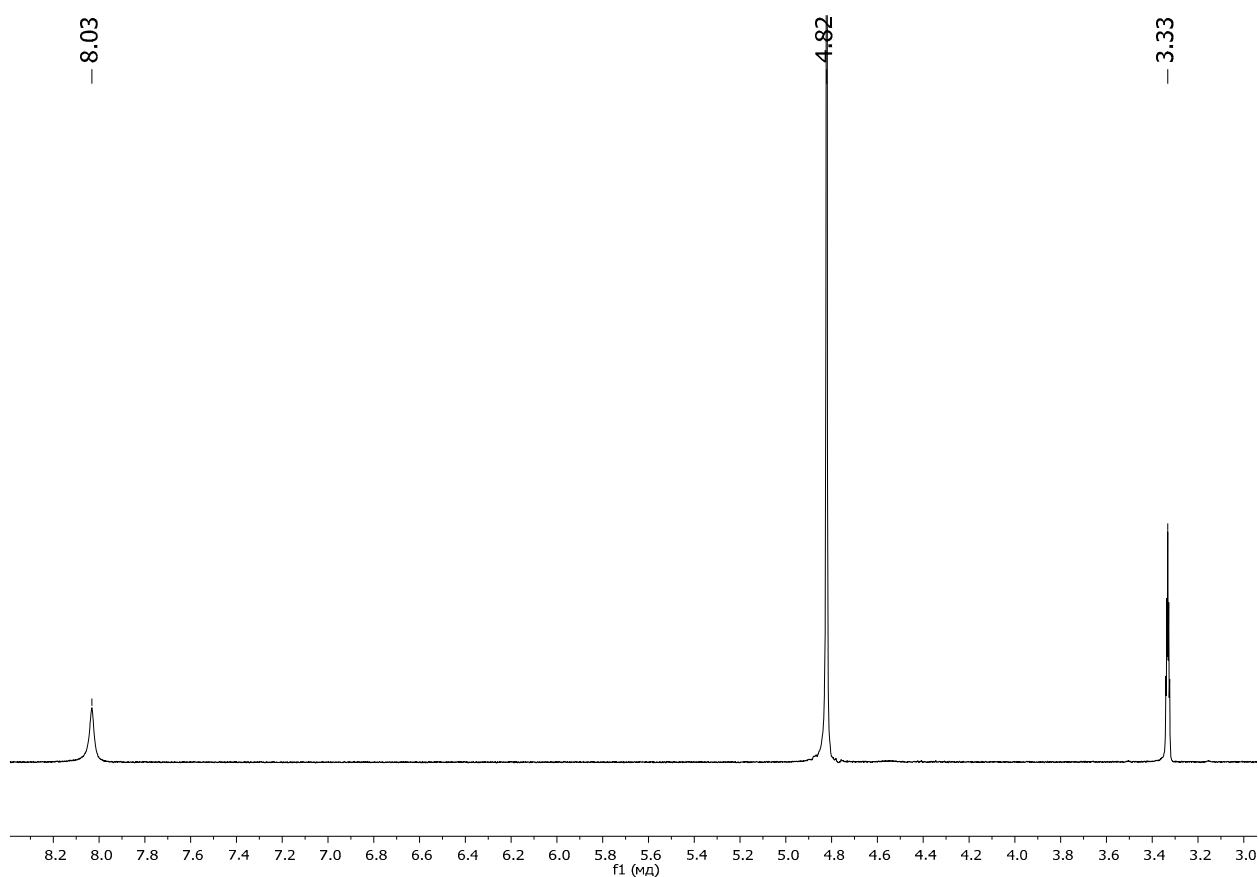

**Figure S18.**  $^1\text{H}$  NMR (methanol- $d_4$ , 500 MHz, 303 K) of compound **1**.

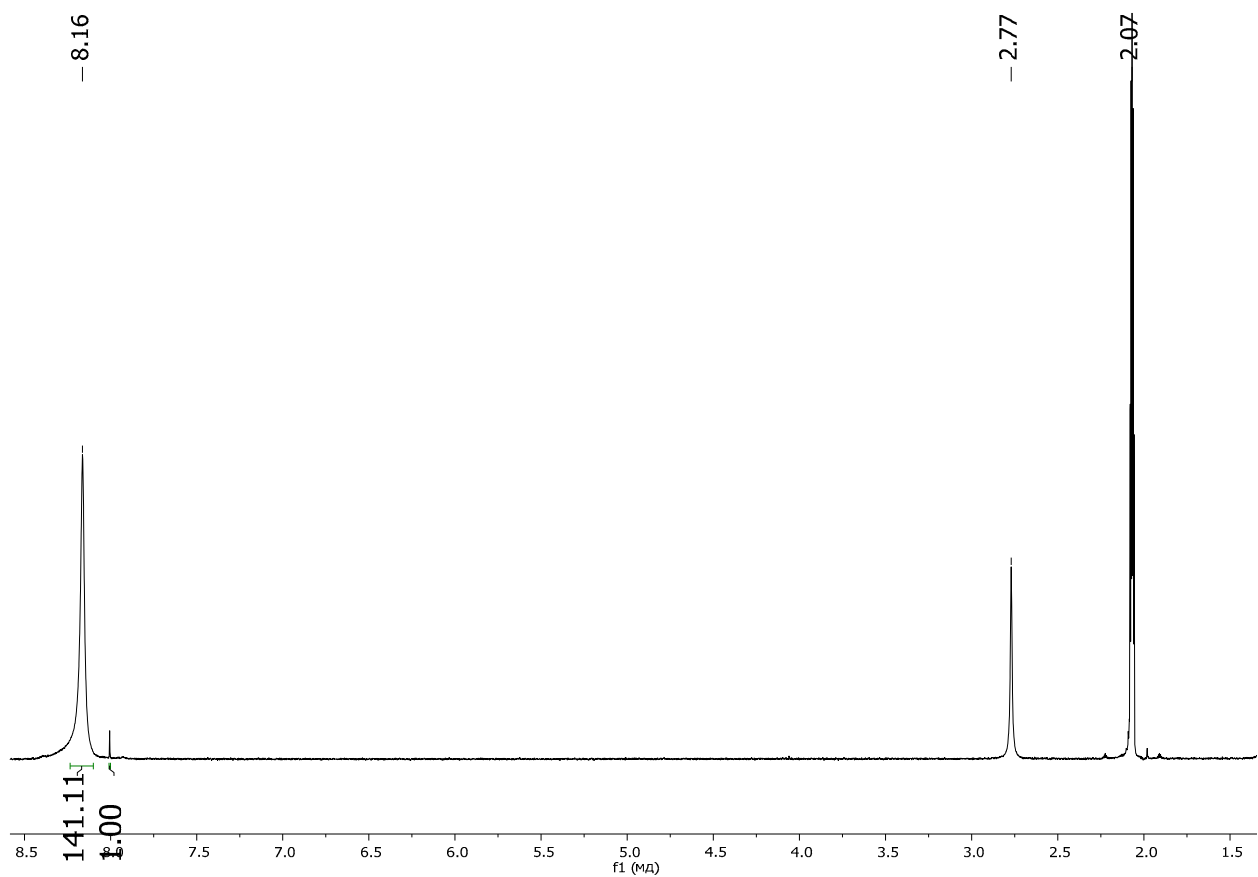

**Figure S19.**  $^1\text{H}$  NMR (acetone- $d_6$ , 500 MHz, 303 K) of compound **1**.

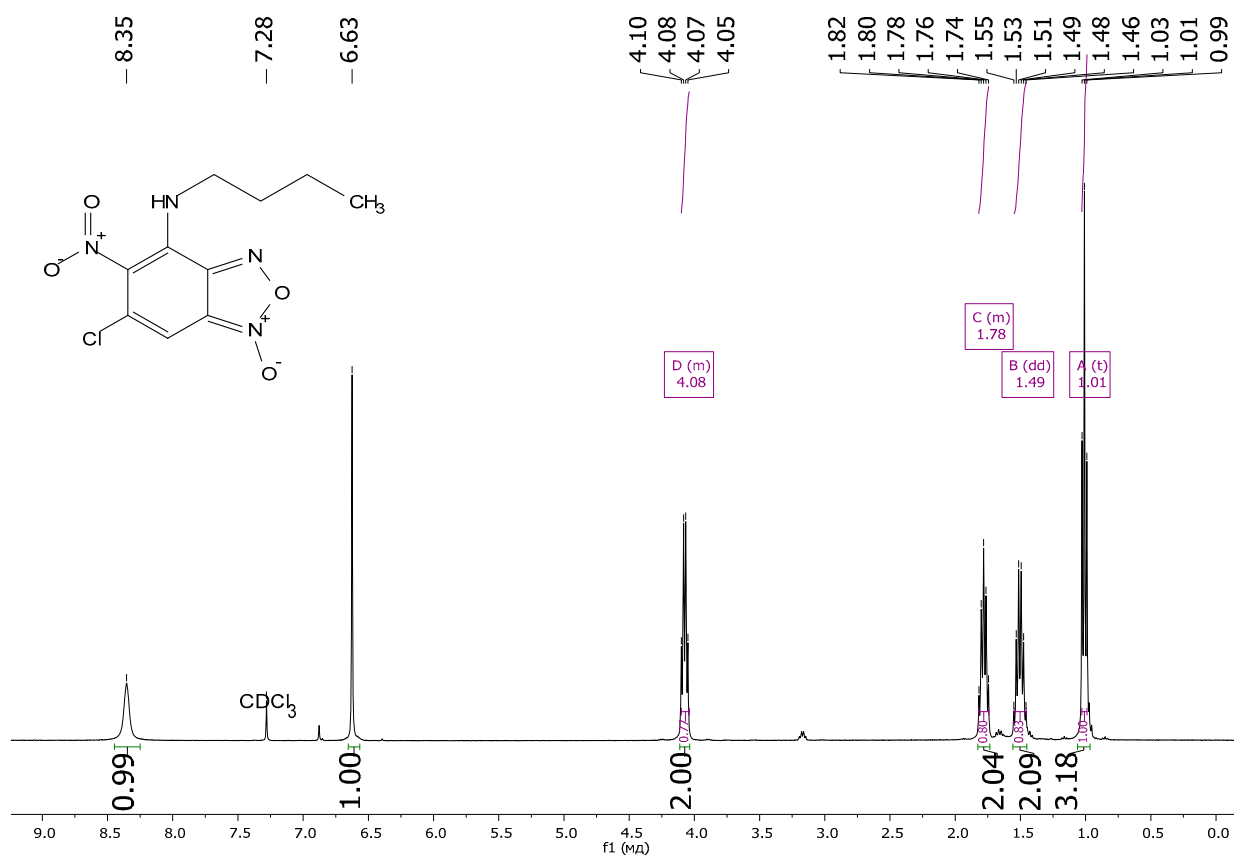

Figure S20. <sup>1</sup>H NMR (CDCl<sub>3</sub>, 500 MHz, 303 K) of compound 5.

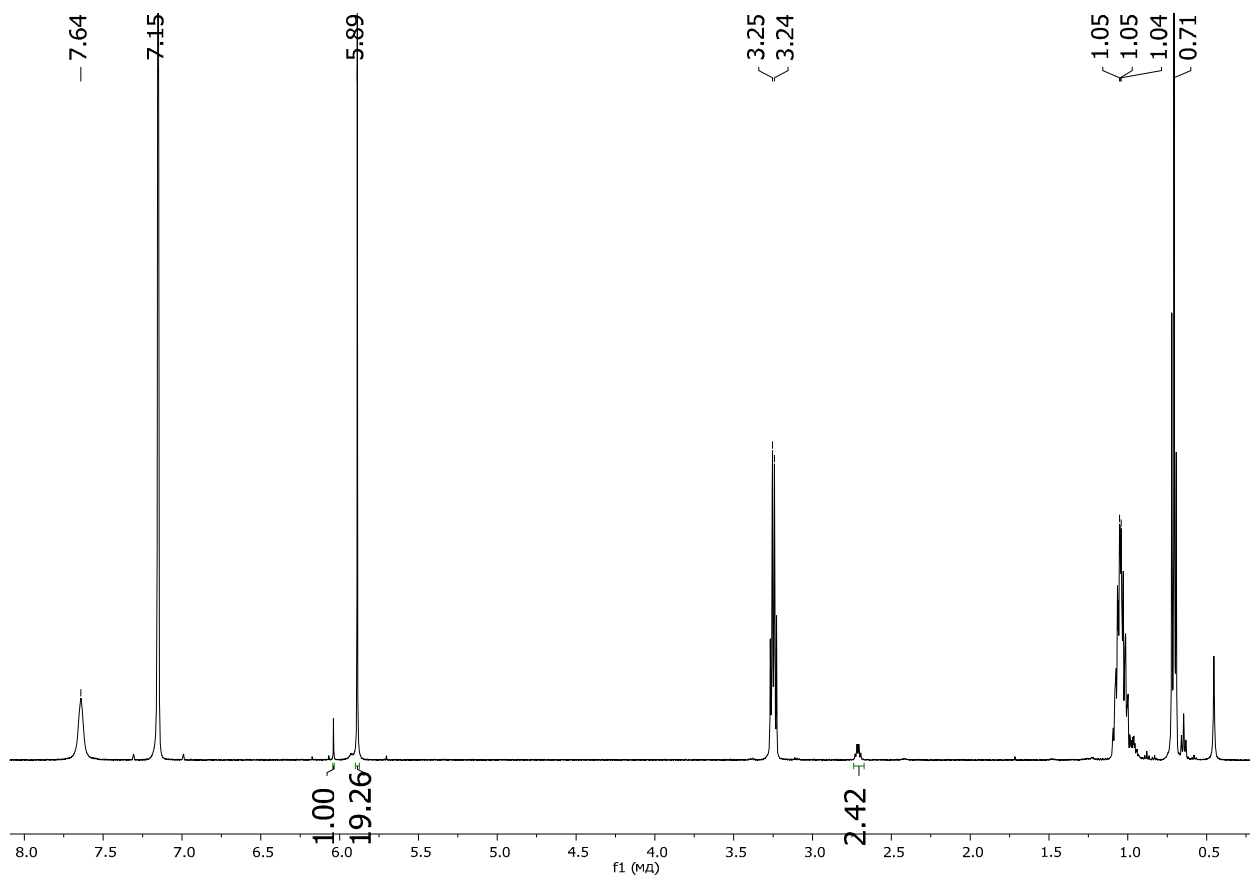

Figure S21. <sup>1</sup>H NMR (benzene-*d*<sub>6</sub>, 500 MHz, 303 K) of compound 5.

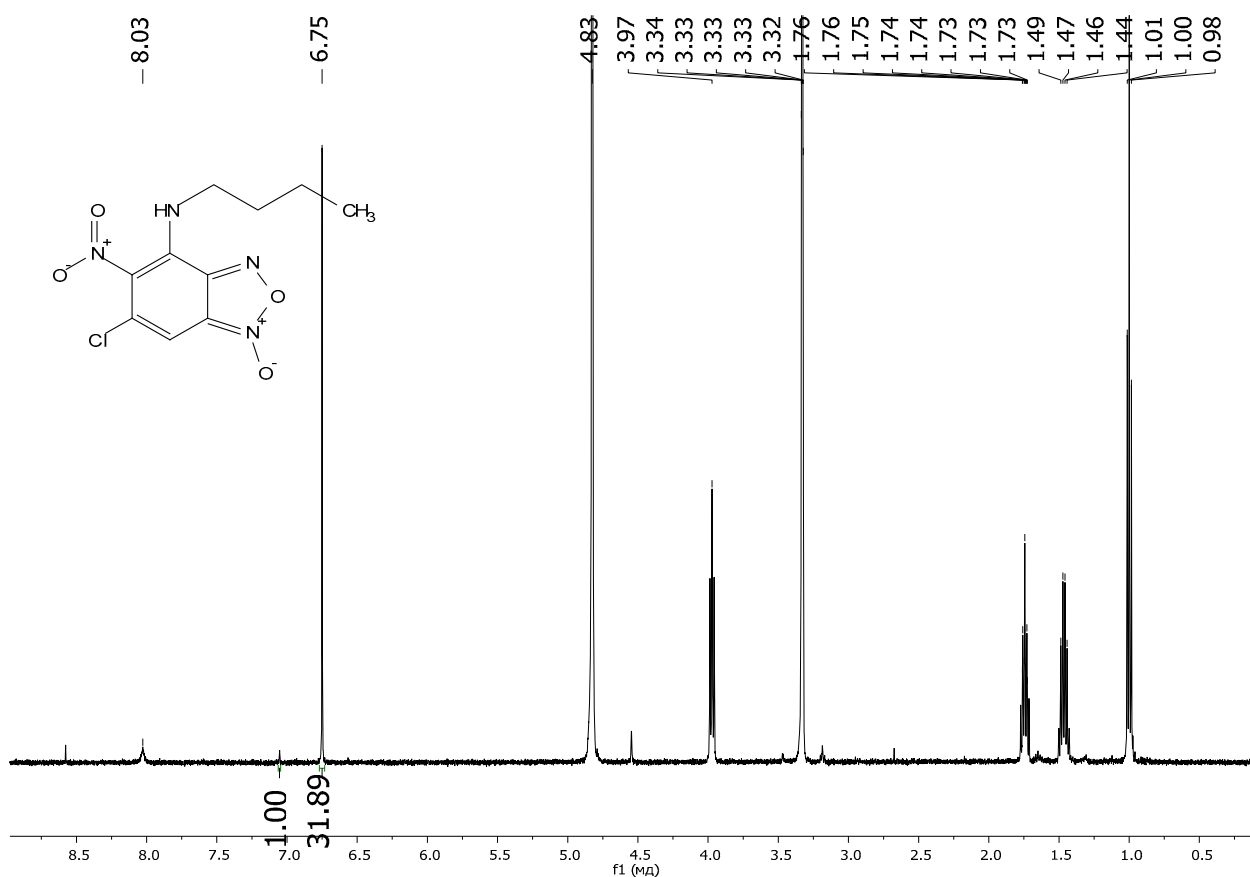

Figure S22. <sup>1</sup>H NMR (methanol-*d*<sub>4</sub>, 500 MHz, 303 K) of compound 5.

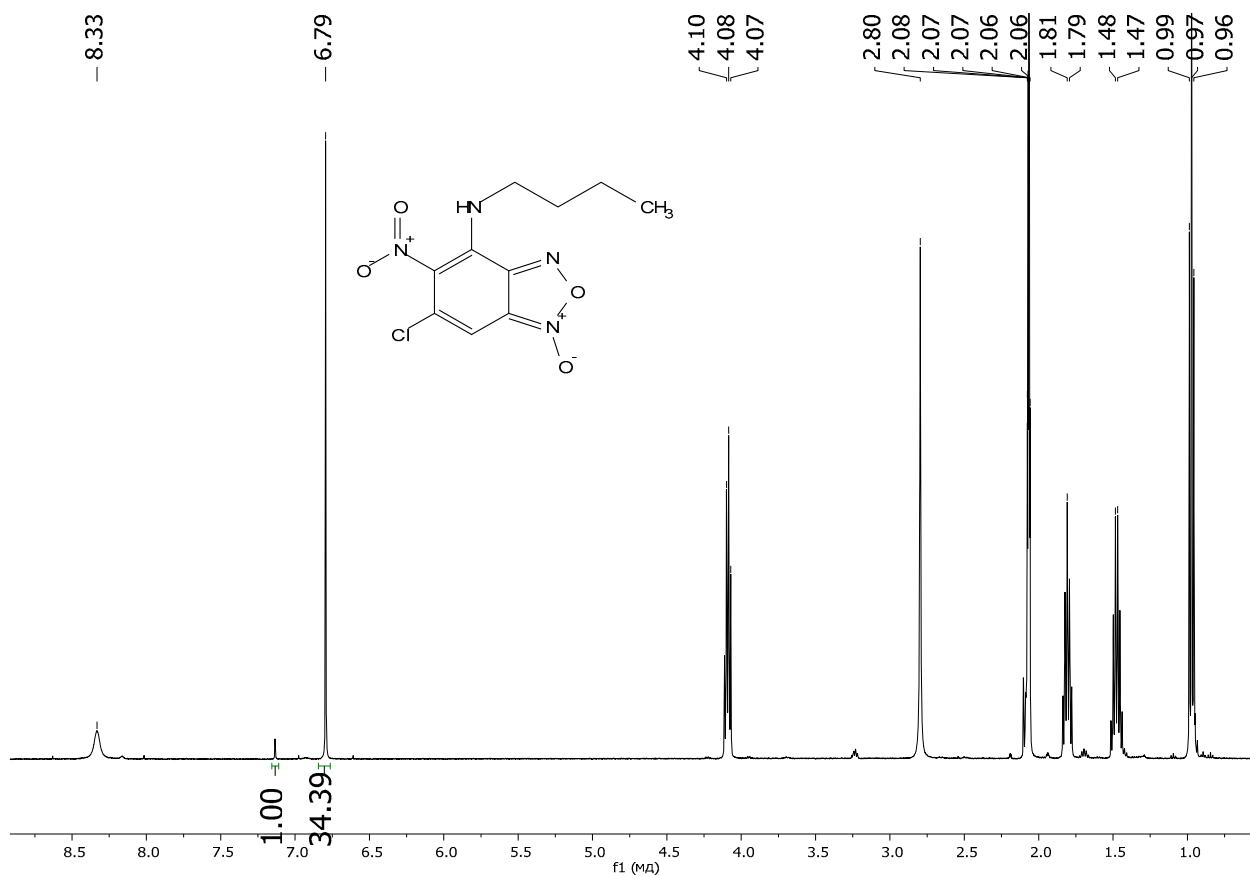

Figure S23. <sup>1</sup>H NMR (acetone-*d*<sub>6</sub>, 500 MHz, 303 K) of compound 5.

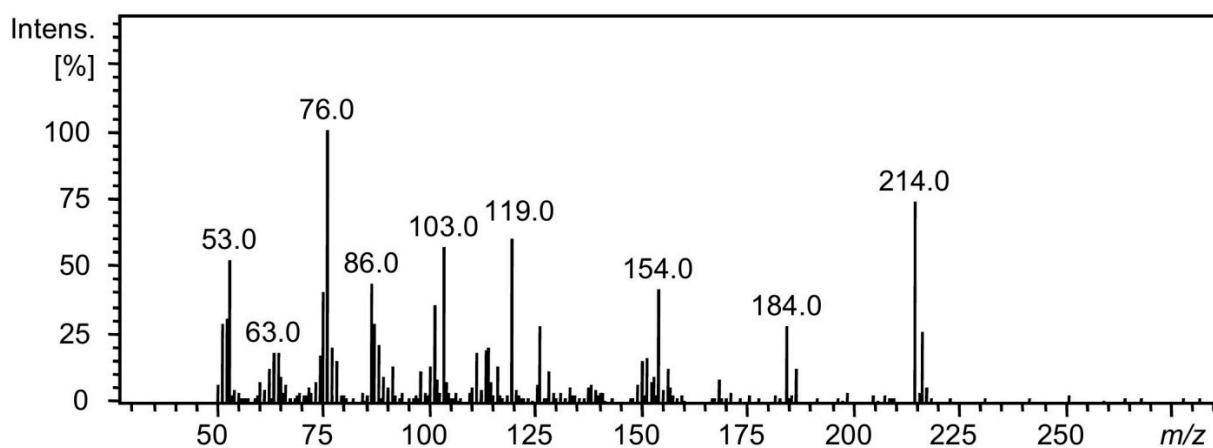

Figure S24. EI mass spectrum (70 eV) of compound 3

Table S3. Change in chemical shifts between tautomers and when changing the solvent for compound 3A/3B.

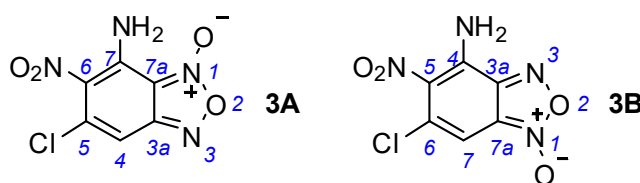

| 3A    |                            |                               |            |       |            | 3B    |                            |            |                               |            |            |       |            |            |
|-------|----------------------------|-------------------------------|------------|-------|------------|-------|----------------------------|------------|-------------------------------|------------|------------|-------|------------|------------|
|       | acetone-<br>d <sub>6</sub> | C <sub>6</sub> D <sub>6</sub> |            | MeOD  |            |       | acetone-<br>d <sub>6</sub> |            | C <sub>6</sub> D <sub>6</sub> |            | MeOD       |       |            |            |
|       |                            |                               | $\Delta 1$ |       | $\Delta 1$ |       |                            | $\Delta 2$ |                               | $\Delta 2$ | $\Delta 1$ |       | $\Delta 2$ | $\Delta 1$ |
| (C7)  | 151.3                      | 150.5                         | -<br>0.8   | 151.9 | 0.6        | (C4)  | 148                        | -3.3       | 146.5                         | -4.0       | -<br>1.5   | 148.6 | -3.3       | 0.6        |
| (C5)  | 137.6                      | 136.3                         | -<br>1.3   | 137.8 | 0.2        | (C6)  | 137.7                      | 0.1        | n/o/                          |            |            | 138.4 | 0.6        | 0.7        |
| (C3a) | 133.8                      | 134.3                         | 0.5        | 134.7 | 0.9        | (C7a) | 112.8                      | -<br>21.0  | n/o/                          |            |            | 113.5 | -<br>21.2  | 0.7        |
| (C6)  | 124.2                      | 124.6                         | 0.4        | 125.0 | 0.8        | (C5)  | 127.8                      | 3.6        | 127.7                         | 3.1        | -<br>0.1   | 128.3 | 3.3        | 0.5        |
| (C7a) | 109.0                      | 108                           | -<br>1.0   | 109.4 | 0.4        | (C3a) | 129.0                      | 20.0       | 129.3                         | 21.3       | 0.3        | 130.1 | 20.7       | 1.1        |
| (C4)  | 105.3                      | 105.6                         | 0.3        | 105.6 | 0.3        | (C7)  | 100.3                      | -5.0       | 101.8                         | -3.8       | 1.5        | 100.2 | -5.4       | -<br>0.1   |

$\Delta 1 = \delta(\text{in solvent}) - \delta(\text{in acetone-d}_6)$ ;  $\Delta 2 = \delta(3B) - \delta(3A)$
